# Supplementary material for: Microbial Ecology of Pecorino Siciliano PDO Cheese Production Systems
Source: MDPI journal article supplement (doi:10.3390/fermentation9070620), 2023-06-29
Supplement: s1 [file s1]

**Supplementary Table S1.** List of primers used in this study

| Primer                                       | Sequence (5'-3')             | Amplicon size (bp) |
|----------------------------------------------|------------------------------|--------------------|
| <i>S. thermophilus</i> <i>rgp</i> genotyping |                              |                    |
| MSControl F                                  | gctggtcgtaatcacctcg          | 2724               |
| MSControl R                                  | caacatcttccaaggtacg          |                    |
| Multiplex system 1                           |                              |                    |
| Var1F                                        | gtatataatgcacaagaggg         | 895                |
| Var1R                                        | gaaactaatcttaagcgttcc        |                    |
| Var2F                                        | ggaaccattgaagtaagg           | 546                |
| Var2R                                        | cttcagacctaacatttgac         |                    |
| Var3F                                        | gcttcagatgcaaaaacg           | 271                |
| Var3R                                        | gtgttactatcatggcaag          |                    |
| Var4F                                        | gtgaagaatgtagatgacc          | 1086               |
| Var4R                                        | caataacaagtgctaagac          |                    |
| Var5F                                        | ccccattggaggatatacgag        | 376                |
| Var5R                                        | tgggtagtacgggttcgtcac        |                    |
| Multiplex system 2                           |                              |                    |
| Fg1F                                         | gtcatgtgctctaccaattg         | 1481               |
| Fg1R                                         | gatggagcttataacgttc          |                    |
| Fg2F                                         | gtcttcataccatccatg           | 1040               |
| Fg2R                                         | gttcaactgcttattatcg          |                    |
| Fg3F                                         | gcttggcatgatggtatg           | 852                |
| Fg3R                                         | gaataacatcacgtcctcg          |                    |
| <i>Lactococcus</i> <i>cwps</i> genotyping    |                              |                    |
| CONF                                         | gtacactatgtttataacaatcatccag | 891                |
| CONR                                         | gcaaaccagattcaaagtcagtatg    |                    |
| cwpsAF                                       | gtgcctatgctccgtagtc          | 442                |
| cwpsAR                                       | cgagggccaatctctttacc         |                    |

---

|                                       |                          |      |
|---------------------------------------|--------------------------|------|
| cwpsBF                                | gattcagttgcacggccg       |      |
| cwpsBR                                | agtaagggggcggattgtg      | 183  |
| cwpsCF                                | aaagctcatctttccctgttgt   |      |
| cwpsCR                                | gcaccatagtctggaataagacc  | 686  |
| <b><i>Lactococcus C</i> subtyping</b> |                          |      |
| C1F                                   | gtcatcaaacatactttcgtc    |      |
| C1R                                   | aagttttgccattgtttctcc    | 650  |
| C2F                                   | gaacaatggattatttatgtctga |      |
| C2R                                   | attcccattttcagcaacaag    | 450  |
| C3F                                   | gttgtaattgttactagccag    |      |
| C3R                                   | tcaatcg cattatagattacacc | 250  |
| C4F                                   | gattttattcgaggcttagca    |      |
| C4R                                   | tagcattacaatcaatctgtca   | 968  |
| C5F                                   | gattatattcggggcttagca    |      |
| C5R                                   | tgtaatatggtattgtctagca   | 1141 |

**Supplementary Table S2.** Viable counts of presumptive LAB on LM17 and MRS agar at different temperatures

|               | LM17     |          |          | MRS      |          |          |
|---------------|----------|----------|----------|----------|----------|----------|
|               | 30°C     | 37°C     | 42°C     | 30°C     | 37°C     | 42°C     |
| <b>Farm 1</b> |          |          |          |          |          |          |
| Milk          | 8.70E+04 | 8.80E+03 | 7.90E+03 | 1.24E+07 | 9.50E+04 | 1.07E+05 |
| Curd          | 2.90E+05 | 1.68E+05 | 1.23E+05 | 1.38E+07 | 4.90E+05 | 2.32E+05 |
| Whey          | 1.68E+04 | 5.10E+03 | 5.90E+03 | 3.10E+04 | 3.00E+02 | 0.00E+00 |
| <b>Farm 2</b> |          |          |          |          |          |          |
| Milk          | 5.30E+07 | 2.75E+05 | 2.25E+06 | 9.60E+06 | 1.24E+05 | 1.55E+05 |
| Curd          | 3.50E+07 | 5.00E+04 | 3.60E+04 | 2.37E+06 | 3.70E+04 | 1.60E+04 |
| Whey          | 2.65E+05 | 1.27E+05 | 2.44E+04 | 4.16E+04 | 3.30E+03 | 1.02E+03 |
| <b>Farm 3</b> |          |          |          |          |          |          |
| Milk          | 3.40E+06 | 2.06E+06 | 3.58E+05 | 2.78E+06 | 1.26E+07 | 5.50E+04 |
| Curd          | 2.88E+07 | 4.50E+06 | 3.50E+06 | 3.60E+05 | 1.00E+06 | 5.00E+05 |
| Whey          | 1.60E+05 | 1.65E+05 | 1.19E+05 | 3.68E+04 | 1.01E+03 | 1.22E+03 |
| <b>Farm 4</b> |          |          |          |          |          |          |
| Milk          | 1.40E+08 | 5.40E+03 | 5.70E+03 | 7.80E+03 | 3.10E+03 | 2.60E+03 |
| Curd          | 8.00E+07 | 0.00E+00 | 0.00E+00 | 0.00E+00 | 0.00E+00 | 0.00E+00 |
| Whey          | 0.00E+00 | 0.00E+00 | 0.00E+00 | 0.00E+00 | 0.00E+00 | 0.00E+00 |
| <b>Farm 5</b> |          |          |          |          |          |          |
| Milk          | 2.31E+08 | 2.57E+02 | 1.01E+02 | 1.23E+04 | 2.10E+02 | 1.19E+03 |
| Curd          | 4.40E+08 | 2.25E+05 | 1.72E+06 | 1.10E+08 | 1.24E+06 | 2.54E+05 |
| Whey          | 0.00E+00 | 0.00E+00 | 0.00E+00 | 0.00E+00 | 0.00E+00 | 0.00E+00 |
